# Supplementary material for: Daily Vinegar Ingestion Improves Depression Scores and Alters the Metabolome in Healthy Adults: A Randomized Controlled Trial
Source: MDPI journal article supplement (doi:10.3390/nu13114020), 2021-11-11
Supplement: s1 [file s1]

## SUPPLEMENTARY MATERIALS

### Daily Vinegar Ingestion Improves Depression Scores and Alters the Metabolome in Healthy Adults: A Randomized Controlled Trial

Carol S Johnston<sup>1\*</sup>, Paniz Jasbi<sup>1</sup>, Yan Jin<sup>1</sup>, Shayna Bauer<sup>1</sup>, Susanna Williams<sup>1</sup>, Samantha Fessler<sup>1</sup>, and Haiwei Gu<sup>1</sup>

<sup>1</sup>College of Health Solutions, Arizona State University, Arizona USA; carol.johnston@asu.edu (CSJ); pjasbi@asu.edu (PJ); kimyeon909@gmail.com (YJ); sdbauer2@asu.edu (SB); williamssuzy98@gmail.com (SW); sfessler@asu.edu (SF); hgu@fiu.edu (HG)

\*Correspondence: carol.johnston@asu.edu

**Table S1.** Metabolite changes over the trial period that differed significantly between groups as determined by independent samples *t*-test\*.

| Metabolite               | <i>p</i> |
|--------------------------|----------|
| 3-Hexenedioic acid       | 0.002    |
| Hexanoic acid            | 0.002    |
| Homoserine               | 0.007    |
| Threonine                | 0.007    |
| Methionine               | 0.011    |
| Fructose                 | 0.012    |
| 3-Methyladipic acid      | 0.021    |
| Imidazole                | 0.023    |
| N-Acetyl-D-galactosamine | 0.026    |
| Fumarate                 | 0.027    |
| Proline                  | 0.027    |
| Acetylcysteine           | 0.031    |
| Sarcosine                | 0.038    |
| Galactonic acid          | 0.041    |
| Acetohydroxamic acid     | 0.043    |
| Pipecolinic acid         | 0.044    |
| Lauric acid              | 0.049    |

\*Significance calculated using change values (post/pre) between VIN and CON groups.

**Table S2.** Results of enzyme enrichment analysis.

| <b>Enzyme</b>                               | <b>Total</b> | <b>Hits</b> | <b>Statistic</b> | <b><i>p</i></b> |
|---------------------------------------------|--------------|-------------|------------------|-----------------|
| L-threonine deaminase                       | 3            | 1           | 26.783           | 0.007           |
| N-acetylglucosamine-6-phosphate deacetylase | 5            | 3           | 16.009           | 0.011           |
| glucosamine-6-phosphate deaminase           | 6            | 3           | 16.009           | 0.011           |
| N-acetyl-glucosamine lysosomal efflux       | 8            | 3           | 16.009           | 0.011           |
| N-acetylglucosamine kinase                  | 8            | 3           | 16.009           | 0.011           |
| cystathionine beta-synthase                 | 6            | 1           | 24.014           | 0.011           |
| cystathionine g-lyase                       | 6            | 1           | 24.014           | 0.011           |
| H <sub>2</sub> O transport, lysosomal       | 5            | 2           | 19.373           | 0.012           |
| alpha-mannosidase, lysosomal                | 7            | 2           | 19.373           | 0.012           |
| beta-mannosidase, lysosomal                 | 7            | 2           | 19.373           | 0.012           |
| DM Asn-X-Ser/Thr(ly)                        | 7            | 2           | 19.373           | 0.012           |
| mannose efflux from lysosome                | 7            | 2           | 19.373           | 0.012           |
| Iodide: hydrogen-peroxide oxidoreductase 4  | 25           | 2           | 13.786           | 0.026           |
| L-Thyroxine exchange                        | 25           | 2           | 13.786           | 0.026           |

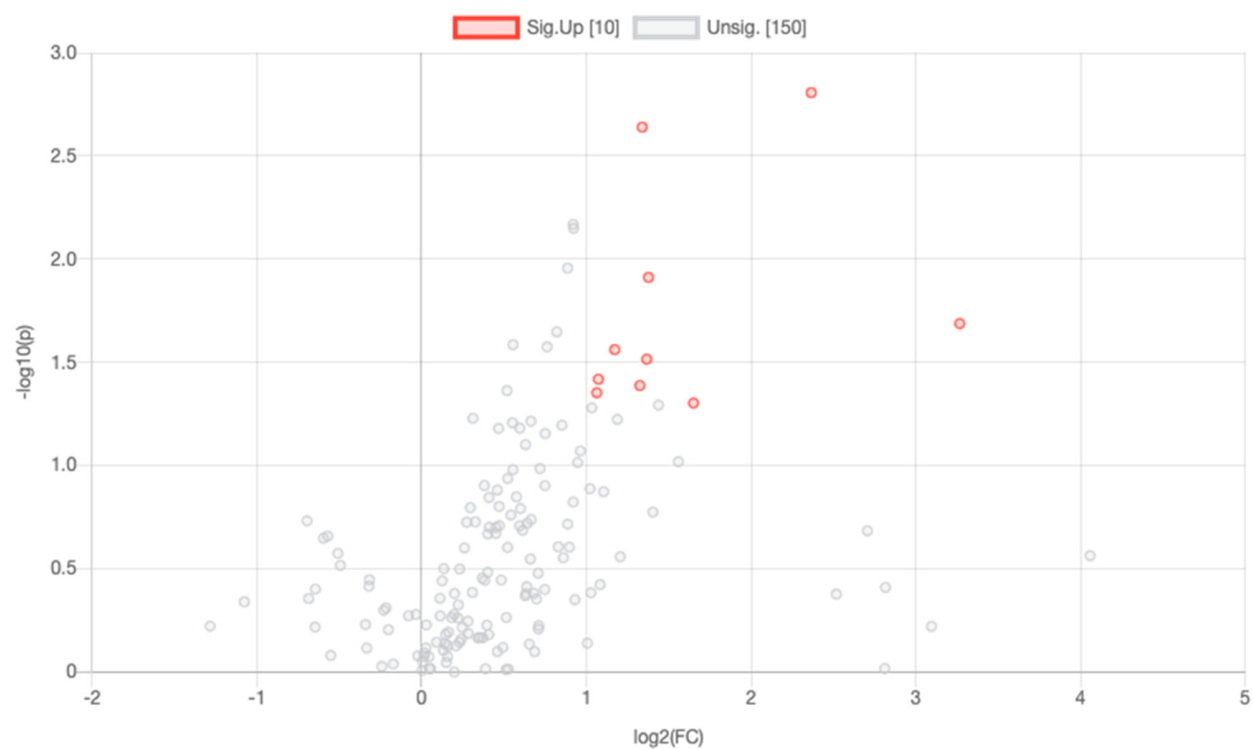

**Figure S1.** Volcano plot displaying the 10 metabolites to be significantly upregulated ( $p < 0.05$ ) with a large magnitude of change ( $\text{FC} > 2.0$ ) in the liquid vinegar group in comparison to controls.

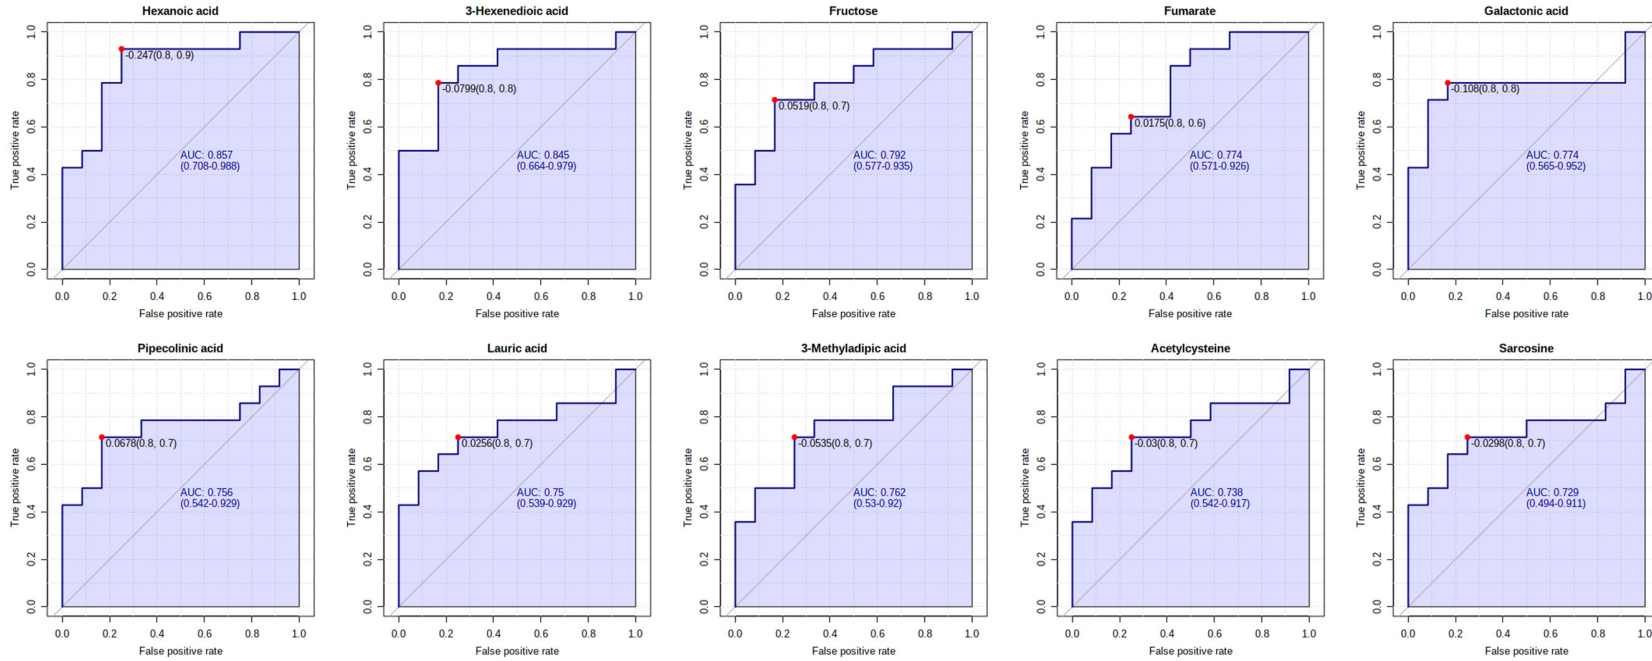

**Figure S2.** Univariate ROC analysis of 10 candidate metabolites with  $p < 0.05$  and  $FC > 2.0$  between groups. Results show AUC with 95% CI in addition to sensitivity and specificity estimates.
